# Supplementary material for: Biodiversity and Citizenship in an Argumentative Socioscientific Process
Source: MDPI journal article supplement (doi:10.3390/su15042987), 2023-02-07
Supplement: s1 [file s1]

## **Supplementary File: Main Students' speech turns**

ST1 What did you think of the video?

ST2 Important...

ST3 Why important?

ST16 just the fact that e:: entering... reaching the extinction of a bee e:: of bees was about to modify our entire global system... because without a bee there wouldn't be a tree would have like poly... E:: how... How... Multiply the species O:: multiply? ((laughs)) there wouldn't be... no ((laughs)) there wouldn't be any way to:: pollinate trees without bees there would be a way to:: carry genetic information from one plant to another

ST 21 There are males and females... When she takes the nectar, the pollen comes along with it. it ends when it goes to get the nectar of another plant and ends up with pollen falling in the:: organ genital of the plant then it fertilizes other plants

ST 22 And why is this important?

ST 23 Because there is the reproduction of species (...) you can talk about it

ST24 because I think that most of our food comes from the flora

ST30 The honey itself, right?

ST32 Without food

ST33 Has no life

ST 39 not counting the food chain

ST40 there is the food chain too

ST41 the animals that feed on bees...

ST42 What animals feed on bees? Bees don't... don't sting?

ST43 I don't know

ST44 Don't you know of any animal that eats bees?

ST 45 The frog must eat

ST51 has several species of bee

ST53 and in the video it says that they have a stingless bee hive

ST54 and why would you think this is important?

ST55 preservation... I think preservation

ST82 and you said that there are several species of bees and:: and the one with a stinger, right? Is it over there it stings a lot of people so if we what if this sting species was the only one that the others having disappeared and:: do you think it's ok?

ST 83 no

ST 84 I don't think so because there would be some... There would be some interference, I just don't know how but there would be some interference because if she has that stinger it's because of some environmental reason

ST 87 I think every living being exists because it has some cause here in the world

ST 90 so what if... What if this didn't exist this one didn't exist::: little bird I don't know if it is a little bird or a wasp is a wasp. If this didn't exist animal there would not have this plant that's it there

ST92 I think people are very lay in matters of animals and species and how the number of species works and how important it is in the chain food and:: what other chains I don't know if food chain would be the term correct but like... I think like when you ask that it's a bee ah a bee makes honey and it stings you know? but we do not know what impact and type we know more or less like this because we had the pibid and also had a work on bees and we also saw it and we know a little bit about it importance only that we are a school with a class that had a class and vaguely remember a subject we do not have a proper study or background on one species or both species we have a vague content only what kind but we know something at least that like if we ask older person she won't know know know know?

ST93 and do you think it is important for this older person to know? Why?

ST98 everyone is part of society right? so i think everyone should understand and be aware

ST 104 because it's no use trying to preserve the bees when the rest of the people they don't even care

ST109 that young people kind of say that we have the strength that we can do, but we can't do anything without the older ones because it's no use like it's no use half a doze or I don't know a hundred thousand young people talking like that like () bees and industry owners don't shut up, you know?

ST 111 and because industry owners are important in this discussion that we are having?

ST 112 because they do the productions sometimes they use the bees  
other times they kill the bees other times they pollute where the bees live...

ST114 maybe yes but it would take a long time right? Would it take a long time for an animal to adapt or if not

ST115 and what would be the consequence of that?

ST116 the animal would not be able to feed itself

ST117 and for the plant?

ST118 the plant will not be able to proliferate

ST 127 I think that each animal has its purpose, its instinct, so not really they had to die for each other to go there and adapt, you know? Like doing that truth everyone should exist and do their job their institutes normally

ST 150 (...) SOLUTION? I think this is more of an emergency option

ST158 I would say that a more utopian proposal would be a strong awareness campaign but you know STRONG ((laughs)) and:: for example an awareness campaign but not like those like dengue until dengue worked like an intervention proposal like like dengue, you know?

ST164 but what can these people do? Bees are disappearing

ST 165 I think stop deforesting and polluting and::

ST190 I think that in the case that S3 talked about using technology to reach everyone, I think that the biggest ones in this case, the government has to do something because so many of the adults end up that's what we said before, the young people, only that they can't and:: talk to an adult what does it do that's better for us understand?... they are influenced by someone bigger in this case we are more used to seeing our parents watching tv watching the newspaper so I think when it comes to the extreme case like... that will end up in the newspaper or that the government is saying or that the president is saying that:: someone very loud is talking like they will understand like wow it's happening this is better for me

ST 225 it's not that I was going to say that either the people they don't want or the person who controls it don't care. Because like if a big industry doesn't want like no want to stop with your terms and there are no public policies for that, it won't like there is no like at least I think there is no law that says that there really isn't a law that you can't kill species, isn't there? type in bulk kind of endangered but like ah it's not extinct like he's going to put a public policy more or less there to e:: justify the damage he did

ST230 because the type that is not even shown in the video, it only takes the pollen and exerts its normal function would no longer have honey produced naturally and it is one of our how can I say is very consumed honey is part of the life of any being human for sure and I think that would be just one more factor in pollution because the bee would stay there and if something went wrong, an error would fall several and it would end up affecting the biological factor of the world

ST 240 honey is not a priority

ST241 is because nobody eats honey

ST 242 it's because it's not like our culture to eat honey our culture here in brazil is because like I don't see anyone spreading honey with bread in the morning ((laughs))

ST 243 but it's not exactly just honey, there are honey derivatives that we can also eat

ST 261 not counting the animals that would feed on these robot bees

ST 262 but i think

ST 263 do you think any animal would feed on them?

ST 264 if he feeds on a normal bee he will feed on them

ST 265 and would somehow also affect the food chain

ST 266 imagine a little bird eating a robot bee...

ST 267 yes

ST 268 It would going to choke to death... Now imagine this on a large scale in Brazil in the states  
United States

ST 269 In the world

ST 270 and who do you think would have these bees?

ST 271 the rich

ST 272 why?

ST 273 the united states

ST 274 developed countries

ST 285 The world's elite would have more capacity to have this, you know? So like these bees I don't think they are one hundred percent autonomous there is a distance limit, you know, I think it would not be for all the humanity

ST296 and it would also be a very high technology for the type that is making the prototype in the United States at Harvard, like until it arrives here in Brazil until it arrives

ST 297 if you arrive

ST 298 if you get here ((laughs)) and it's like, it's not going to be in the big crowd, you know? And if you go to the mass

ST303 firstly the cost of living would be higher because to be using these bees they would have to increase the price of things that are all

ST313 the possible causes are that some farmers in the industries used the bees to produce honey and sell it and like they took a hive several whole hives what type they made honey and they went there and put poison but they that's it and also because of the deforestation that took away their habitat

ST 341 in my opinion, there was no need to:: make laws to change this, it had to be imposed on the minds of people who:: taking care of bees is essential, you know?
