# Supplementary material for: Biodiversity and Citizenship in an Argumentative Socioscientific Process
Source: MDPI journal article supplement (doi:10.3390/su15042987), 2023-02-07
Supplement: s1 [file s1]

Archive with 1 entries (1 files):
- sustainability-2122527-supplementary.pdf
